# Supplementary material for: Comparative Study of Physicochemical Properties of Alginate Composite Hydrogels Prepared by the Physical Blending and Electrostatic Assembly Methods
Source: MDPI journal article supplement (doi:10.3390/gels8120799), 2022-12-05
Supplement: s1 [file s1]

## Support Information

### Comparative study of physicochemical properties for alginate composite hydrogels prepared by the physical blending and electrostatic assembly methods

Yanshi Wen <sup>a,b,c</sup>, Xiuqiong Chen <sup>a,b,c</sup>, Huiqiong Yan <sup>a,b,c\*</sup>, Qiang Lin <sup>a,b,c</sup>

<sup>a</sup> Key Laboratory of Water Pollution Treatment & Resource Reuse of Hainan province, College of chemistry and chemical engineering, Hainan Normal University, Haikou 571158, China

<sup>b</sup> Key Laboratory of Natural Polymer Functional Material of Haikou City, College of chemistry and chemical engineering, Hainan Normal University, Haikou 571158, China

<sup>c</sup> Key Laboratory of Tropical Medicinal Resource Chemistry of Ministry of Education, College of Chemistry and Chemical Engineering, Hainan Normal University, Haikou 571158, China

\*Correspondence: Tel.: yanhqedu@163.com; +86 0898 65884995

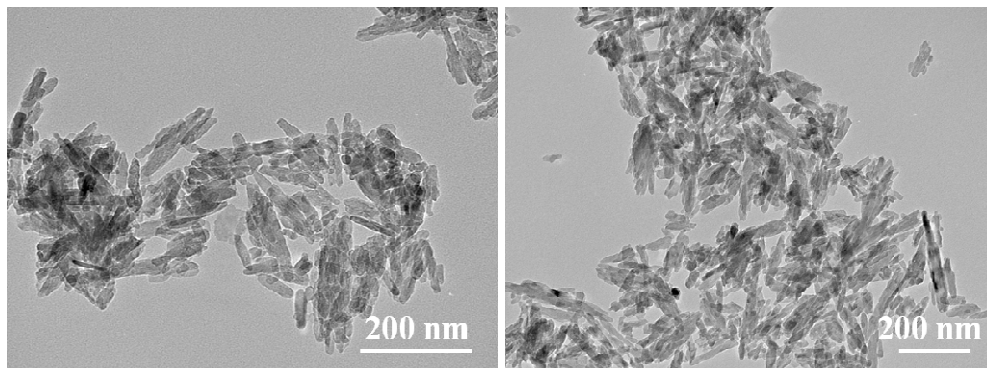

Figure S1. TEM images of HAP nanoparticles at different magnifications.

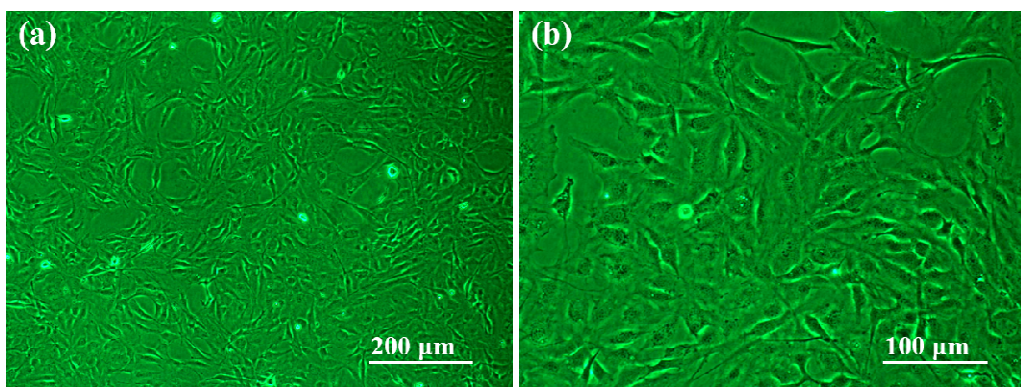

Figure S2. Optical micrographs of (a, b) MC3T3-E1 cells cultured on tissue culture plates at different magnifications.
